# Supplementary material
Source: Springer Nature journal article supplement (https://www.springermedizin.de/resource/supplementary/12875_2010_503_MOESM3_ESM.pdf/9434748)

**Literature review**

**Long list**

**PC Monitor**

*First Selection*

*Expert evaluation*

**Governance of the PC system**

8 features  
81 indicators

8 features  
25 indicators  
14 add. info.items

**6 features**  
12 indicators  
11 add. info.items

**Economic conditions of the PC system**

6 features  
58 indicators

7 features  
28 indicators  
25 add. info.items

**5 features**  
11 indicators  
5 add. info.items

**PC workforce development**

6 features  
108 indicators

6 features  
52 indicators  
44 add. info.items

**5 features**  
16 indicators  
11 add. info.items

**Access to PC services**

7 features  
98 indicators

7 features  
46 indicators  
6 add. info.items

**5 features**  
12 indicators  
4 add. info.items

**Continuity of PC**

4 features  
111 indicators

3 features  
8 indicators  
22 add. info.items

**3 features**  
9 indicators  
4 add. info.items

**Coordination of PC**

5 features  
90 indicators

5 features  
14 indicators  
40 add. info.items

**4 features**  
7 indicators  
1 add. info.items

**Comprehensiveness of PC**

6 features  
137 indicators

6 features  
110 indicators

**7 features**  
10 indicators  
8 add. info.items

**Quality of PC**

9 features  
151 indicators

7 features  
101 indicators

**5 features**  
17 indicators

**Efficiency of PC**

3 features  
18 indicators

1 feature  
7 indicators

**1 feature**  
5 indicators

**Equity in health**

1 feature  
12 indicators

1 feature  
9 indicators

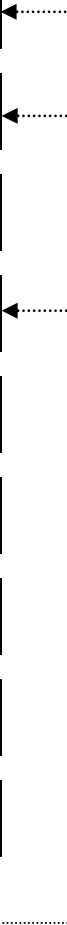

Supplement: MOESM3 [file 9434748]
